# Supplementary material for: A Fundamental Regulatory Mechanism Operating through OmpR and DNA Topology Controls Expression of Salmonella Pathogenicity Islands SPI-1 and SPI-2
Source: PubMed Central journal article supplement (PMC3310775; doi:10.1371/journal.pgen.1002615), 2012-03-22
Supplement: pgen.1002615.s003.pdf [file pgen.1002615.s003.pdf]

## Supporting Table 1: Strains used in this study

| Strain or plasmid                             | Description / genotype                                                            | Reference  |
|-----------------------------------------------|-----------------------------------------------------------------------------------|------------|
| <b><i>E. coli</i></b>                         |                                                                                   |            |
| XL-1                                          | <i>recA1 endA1 gyrA96 thi-1 hsdR17 supE44 relA1 lac</i>                           | Stratagene |
| BL21                                          | <i>E. coli</i> B, F- <i>dcm ompT hsdS(rB- mB-) gal</i>                            | [1]        |
| CSH50                                         | F- $\lambda$ - <i>ara</i> $\Delta$ ( <i>lac-pro</i> ) <i>rpsL thi fimE::IS1</i>   | [2]        |
| <b><i>S. enterica</i> serovar Typhimurium</b> |                                                                                   |            |
| SL1344                                        | <i>rpsL hisG</i>                                                                  | [3]        |
| SL1344 <i>fis::kan</i>                        | <i>fis</i> , Kan <sup>r</sup>                                                     | This study |
| SL1344 <i>ompR::kan</i>                       | <i>ompR</i> , Kan <sup>r</sup>                                                    | This study |
| SL344 <i>envZ::kan</i>                        | <i>envZ</i> , Kan <sup>r</sup>                                                    | This study |
| SL1344 <i>ompB::kan</i>                       | <i>ompR-envZ</i> , Kan <sup>r</sup>                                               | This study |
| SL1344 <i>ssrAB::kan</i>                      | <i>ssrAB</i> , Kan <sup>r</sup>                                                   | This study |
| SL1344 <i>hilD::kan</i>                       | <i>hilD</i> , Kan <sup>r</sup>                                                    | [4]        |
| SL1344 <i>rpoS::kan</i>                       | <i>rpoS</i> , Kan <sup>r</sup>                                                    | [5]        |
| SL1344 <i>ompR:flag</i>                       | <i>ompR:flag</i> epitope fusion                                                   | This study |
| SL1344 <i>fis:myc</i>                         | <i>fis:myc</i> epitope fusion                                                     | This study |
| SL1344 <i>ompR:flag/fis:myc</i>               | <i>ompR:flag</i> and <i>fis:myc</i> epitope fusions                               | This study |
| <b>Plasmids</b>                               |                                                                                   |            |
| pBAD33                                        | Cm <sup>r</sup>                                                                   | [6]        |
| pBAD- <i>ompB</i>                             | pBAD33 containing <i>S. enterica ompR-envZ</i>                                    | This study |
| pUC18                                         | Amp <sup>r</sup> (Carb <sup>r</sup> )                                             |            |
| pZec                                          | Amp <sup>r</sup> (Carb <sup>r</sup> ), promoterless <i>gfp+</i>                   | [7]        |
| pZec-PssrA                                    | P <sub><i>ssrA</i></sub> cloned in pZec                                           | [7]        |
| pZec-PhilC                                    | P <sub><i>hilC</i></sub> cloned in pZec                                           | This study |
| pZec-PhilD                                    | P <sub><i>hilD</i></sub> cloned in pZec                                           | This study |
| pZec-PompR                                    | P <sub><i>ompR</i></sub> cloned in pZec                                           | This study |
| pZep                                          | Amp <sup>r</sup> (Carb <sup>r</sup> ), Cm <sup>r</sup> , promoterless <i>gfp+</i> | [8]        |
| pZep-PssrA                                    | P <sub><i>ssrA</i></sub> cloned in pZep                                           | This study |
| pZep-PhilC                                    | P <sub><i>hilC</i></sub> cloned in pZep                                           | This study |
| pZep-PhilD                                    | P <sub><i>hilD</i></sub> cloned in pZep                                           | This study |
| pZep-PompR                                    | P <sub><i>ompR</i></sub> cloned in pZep                                           | This study |
| pZep-PhilA                                    | P <sub><i>hilA</i></sub> cloned in pZep                                           | This study |
| pZep-PssaB                                    | P <sub><i>ssaB</i></sub> cloned in pZep                                           | This study |
| pZep-PsseA                                    | P <sub><i>sseA</i></sub> cloned in pZep                                           | This study |
| pZep-PssaG                                    | P <sub><i>ssaG</i></sub> cloned in pZep                                           | This study |
| pZep-PssaM                                    | P <sub><i>ssaM</i></sub> cloned in pZep                                           | This study |
| pET21- <i>ompR(D55E)</i>                      | <i>ompR(D55E)</i> cloned in frame with C-terminal His-tag                         | This study |
| pBOP508                                       | 8xMyc epitope                                                                     | [9]        |

Abbreviations: Amp<sup>r</sup>, ampicillin resistance; Carb<sup>r</sup>, carbenicillin resistance; Cm<sup>r</sup>, chloramphenicol resistance; Kan<sup>r</sup>, kanamycin resistance

## References

- Studier FW, Moffatt BA (1986) Use of bacteriophage T7 RNA polymerase to direct selective high-level expression of cloned genes. *J Mol Biol* 189: 113-130.
- Miller JH (1972) *Experiments in Molecular Genetics*. Plainview, N.Y.: Cold Spring Harbor Laboratory Press.
- Hoiseth SK, Stocker BA (1981) Aromatic-dependent *Salmonella typhimurium* are non-virulent and effective as live vaccines. *Nature* 291: 238-239.
- Bustamante VH, Martinez LC, Santana FJ, Knodler LA, Steele-Mortimer O, et al. (2008) HilD-mediated transcriptional cross-talk between SPI-1 and SPI-2. *Proc Natl Acad Sci U S A* 105: 14591-14596.
- Kowarz L, Coynault C, Robbe-Saule V, Norel F (1994) The *Salmonella typhimurium* katF (*rpoS*) gene: cloning, nucleotide sequence, and regulation of *spvR* and *spvABCD* virulence plasmid genes. *J Bacteriol* 176: 6852-6860.
- Guzman LM, Belin D, Carson MJ, Beckwith J (1995) Tight regulation, modulation, and high-level

- expression by vectors containing the arabinose PBAD promoter. *J Bacteriol* 177: 4121-4130.
7. Cameron AD, Stoebel DM, Dorman CJ (2011) DNA supercoiling is differentially regulated by environmental factors and FIS in *Escherichia coli* and *Salmonella enterica*. *Mol Microbiol* 80: 85-101.
  8. Hautefort I, Proenca MJ, Hinton JC (2003) Single-copy green fluorescent protein gene fusions allow accurate measurement of *Salmonella* gene expression in vitro and during infection of mammalian cells. *Appl Environ Microbiol* 69: 7480-7491.
  9. Cho BK, Knight EM, Palsson BO (2006) PCR-based tandem epitope tagging system for *Escherichia coli* genome engineering. *Biotechniques* 40: 67-72.
