# Supplementary material for: A Fundamental Regulatory Mechanism Operating through OmpR and DNA Topology Controls Expression of Salmonella Pathogenicity Islands SPI-1 and SPI-2
Source: PubMed Central journal article supplement (PMC3310775; doi:10.1371/journal.pgen.1002615), 2012-03-22
Supplement: pgen.1002615.s004.pdf [file pgen.1002615.s004.pdf]

## Supporting Table 2: Oligonucleotide primers used in this study

**CLONING** (Restriction enzyme sites used for cloning are underlined)

### *Cloning in pZec*

|              |                                                       |
|--------------|-------------------------------------------------------|
| PompR.NotI.F | 5'- ATA <u>GCG GCC GCT</u> CTT CAC GCC AGA G          |
| PompR.R      | 5'- ATA <u>TCT AGA CGC</u> ATA TCG TCA TCA ACC        |
| PhilC.F      | 5'- ACG <u>CCC CGG GAC</u> AAA TGA CCT CCT GGA TGC    |
| PhilC.R      | 5'- ATT <u>ATC TAG AAT</u> TTG TTC GGC TGT TGA AGG    |
| PhilD.F      | 5'- ATA <u>CCC CGG GCT</u> TGT TAT CGT CTT CTC TTT TG |
| PhilD.R      | 5'- ATT <u>ATC TAG AGA</u> CGC TGA TGA CTA TTA CTT AC |
| PhilA.F      | 5'- ATA <u>CCC CGG GCA</u> TTC ATA AAA ATG GCG AAC C  |
| PhilA.R      | 5'- ATT <u>ATC TAG ACT</u> TTT CTG AGC GTA GCA GGG    |
| PompC.F      | 5'- GGC <u>ACC CGG GAT</u> AAA TCA GCC GGG TGT GTC    |
| PompC.R      | 5'- GCC <u>GTC TAG AAT</u> GTA GGT CTG GTC GCC ATC    |
| PompF.F      | 5'- GGA <u>CCC CGG GCA</u> ACG CCA GCT TCT GAT TTT    |
| PompF.R      | 5'- ACC <u>ATC TAG AGC</u> ATA AGT CTG GTC GGC ATT    |
| PssaB.F      | 5'- ATA <u>CCC CGG GCC</u> GTT TCT GAA CCA TTG AT     |
| PssaB.R      | 5'- ATT <u>ATC TAG ATC</u> CAG GAT CGG CTA TTA CCT T  |
| PsseA.F      | 5'- ATA <u>CCC CGG GTC</u> TGA GTG CCG ATG TGG TAA    |
| PsseA.R      | 5'- ATT <u>ATC TAG ACT</u> CAC CTT AGC CCG GAT TT     |
| PssaG.F      | 5'- ATA <u>CCC CGG GTT</u> TTG GGC GGA CAG ATT TTA    |
| PssaG.R      | 5'- ATT <u>ATC TAG ACG</u> ATT CTG GGT TGA GCA AAT    |
| PssaM.F      | 5'- ATA <u>CCC CGG GAA</u> CTT GGC GAA GTG GAT A      |
| PssaM.R      | 5'- ATT <u>ATC TAG AAG</u> GCC GTT CAG CTA ATC CTG    |

### *Cloning in pET21-d*

|                   |                                                        |
|-------------------|--------------------------------------------------------|
| ompR-C.His-NcoI.F | 5'- CGA <u>CCC ATG GCT</u> CAA GAG AAT TAT AAG ATT CTG |
| ompR-C.His-XhoI.R | 5'- CGC <u>ACT CGA GTG</u> CTT TAG AAC CGT CCG GTA C   |

### *Cloning in pBAD and pUC18* (the *ompB* ribosome binding site is in bold text)

|                  |                                                                  |
|------------------|------------------------------------------------------------------|
| ompR-pBAD-SacI.F | 5'- GTT <u>GGA GCT CTT TGG</u> <b>GAG</b> TAC AGA CAA TGC AAG AG |
| envZ-PstI.R      | 5'- AGC <u>GCT GCA GTG</u> TTC ATT GAG AAC TTC GAG               |

## QUANTITATIVE PCR

### *Gene expression*

|                |                                     |
|----------------|-------------------------------------|
| ssrA.RT.F      | 5'- ACA TAA ACG GCA AAG GAT GGC ACG |
| ssrA.RT.R      | 5'- TCG GGA AGT TTA ACC GTC ACC TCA |
| ompR.RT.F      | 5'- ATC GTC TGC TGA CCC GTG AAT CTT |
| ompR.RT.R      | 5'- TTA CTT TGA CTA CGC AGG CGA CGA |
| hilC.RT/ChIP.F | 5'- TGG CAT GTC CAC GGG TTT GTA GTA |
| hilC.RT/ChIP.R | 5'- AGG AAA TCA AAC CCA CCG GGC TTA |
| hilD.RT.F      | 5'- TGA GTA CGT CAA CGC TCA AAC GGA |
| hilD.RT.R      | 5'- TTG CTG CCT GAT TCA TTC TTG CCG |
| hilA.RT.F      | 5'- ATA TGC CGT TCT GGT CAT CCT GCT |
| hilA.RT.R      | 5'- AGC CCT GTC CGT ACA GTG TTT CAA |

### *Chromatin immuno-precipitation*

|             |                                     |
|-------------|-------------------------------------|
| ssrA.ChIP.F | 5'- ACA GGC AAC TGG AGG GAA GCA TTA |
| ssrA.ChIP.R | 5'- AAG CTG CGG TAA GCA CAG ATA GCA |
| ompR.ChIP.F | 5'- TGC GAA CCT TTG GGA GTA CAG ACA |
| ompR.ChIP.R | 5'- AAG ATT CAC GGG TCA GCA GAC GAT |
| hilD.ChIP.F | 5'- ATT ACC GCA CAG GAC ACA GGG ATT |
| hilD.ChIP.R | 5'- GCG TGT GTT GGC AAT GGT CTG ATT |
| hilA.ChIP.F | 5'- ATA TTT AGA TGC CCG GCG CTG ACT |
| hilA.ChIP.R | 5'- TGT CAT ATT CTA CGG GCT CGG GTT |
| ompC.ChIP.F | 5'- TGA TGG CCT GCA CTA CTT CTC TGA |
| ompC.ChIP.R | 5'- TTT CGC CTT TGA AGC CGA TAC GCA |
| proV.ChIP.F | 5'- CAA TAT TCA TGC CAG AAG CAA A   |
| proV.ChIP.R | 5'- CCA TGC AAT AGA ATG ATT CCT G   |
| bamA.ChIP.F | 5'- TTC GGT ATC GGT TAC GGT ACA     |
| bamA.ChIP.R | 5'- CGT CAA CGG TAA AGT ATG GGT TA  |

## MUTANT CONSTRUCTION

**Deletion mutants** (the *envZ* start codon is underlined)

fis-KOpKD4.F 5'- GAA AAT TTT GCG TAA ACA GAA ATA AAG AGC TGA CAG AAC TGT GTA GGC  
TGG AGC TGC TTC

fis-KOpKD4.R 5'- CCG AGT AGC GCC TTT TTA AAC AAG CAG TTA GCT AAT CGA AAC ATA TGA  
ATA TCC TCC TTA

ompR-KOpKD4.F 5'- ACA CAC TTA CAT TTG TTG CGA ACC TTT GGG AGT ACA GAC AGT GTA GGC  
TGG AGC TGC TTC

ompR-KOpKD4.R 5'- GGG CAA ATG AAC TTC GCG GTG AGA AGC GCA TTC GCC TCA TCA TAT GAA  
TAT CCT CCT TAG

envZ-KOpKD4.F 5'- CTA CGT CTT TGT ACC GGA CGG TTC TAA AGC ATG AGG CGA AGT GTA GGC  
TGG AGC TGC TTC

envZ-KOpKD4.R 5'- GGC GTT GAG AAG AAA GGG AGG GTA ATA CCT CCC TTT CTT ACA TAT GAA  
TAT CCT CCT TAG

ssrAB-KOpSUB11.F 5'- GTG CCA AAG ATT TTG CAA CAG GCA ACT GGA GGG AAG CAT TGA CTA CAA  
AGA CCA TGA CGG

ssrAB-KOpSUB11.R 5'- AAT ATG ACC AAT GCT TAA TAC CAT CGG ACG CCC CTG GTT ACA TAT GAA  
TAT CCT CCT TAG

The *ompB* locus was deleted by combining primers ompR-KOpKD4.F and envZ-KOpKD4.R

**Epitope tagging**

ompR-Flag.F 5'- GGG CCT GGG CTA CGT CTT TGT ACC GGA CGG TTC TAA AGC AGA CTA CAA  
AGA CCA TGA CGG

ompR-Flag.R 5'- GGG CAA ATG AAC TTC GCG GTG AGA AGC GCA TTC GCC TCA TCA TAT GAA  
TAT CCT CCT TAG

fis-Myc.F 5'- GGT ACG CTG CGT AAA AAA TTA AAA AAA TAC GGC ATG AAC GTC GGA TCC  
AGT CTT CGT GAT

fis-Myc.R 5'- GAG TAG CGC CTT TTT AAA CAA GCA GTT AGC TAA TCG AAA AAT TCC GGG  
GAT CCG TCG ACC

**Point mutation of ompR**

ompR-D55E.F 5'- CCA TCT CAT GGT ACT GGA ATT AAT GCT GCC AGG TGA AGA TGG T

ompR-D55E.R 5'- ACC ATC TTC ACC TGG CAG CAT TAA TTC CAG TAC CAT GAG ATG G

**DNASE I FOOTPRINTING AND BANDSHIFT**

pZec-6FAM.F 5'- 6-FAM/AC AAA TCC GCC CTC TAG CAG CCC G

pZec-6FAM.R 5'- 6-FAM/CT CCT TTA CTC ATA TGT ATA TCT CC

pZec-confirm.F 5'- CTG AGT AGG ACA AAT CCG C

pZec-confirm.R 5'- ACG GGA AAA GCA TTG AAC AC
